# Supplementary material for: Single-cell transcriptome of bronchoalveolar lavage fluid reveals sequential change of macrophages during SARS-CoV-2 infection in ferrets
Source: PubMed Central journal article supplement (PMC8316405; doi:10.1038/s41467-021-24807-0), 2021-07-27
Supplement: 41467_2021_24807_MOESM1_ESM.pdf [file 41467_2021_24807_MOESM1_ESM.pdf]

## Supplementary Information

# **Single-cell Transcriptome of Bronchoalveolar Lavage Fluid Reveals Dynamic Change of Macrophages During SARS-CoV-2 Infection in Ferrets**

Jeong Seok Lee, June-Young Koh, Kijong Yi, Young-Il Kim, Su-Jin Park, Eun-Ha Kim, Se-Mi Kim, Sung Ho Park, Young Seok Ju, Young Ki Choi, and Su-Hyung Park

Contents:

Supplementary Figures 1 – 8

## Supplementary Fig. 1

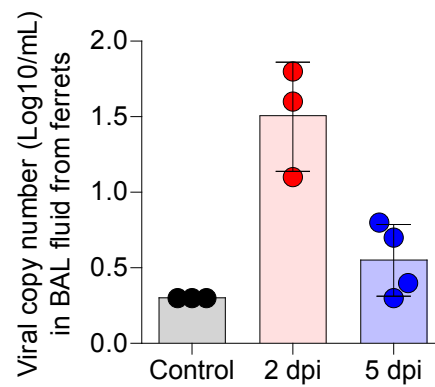

**Supplementary Fig. 1. Viral copy number in BAL fluid from ferrets.** Viral RNA copy number in bronchoalveolar lavage (BAL) fluids from control ferrets and SARS-CoV-2-infected ferrets on 2 and 5 days post-infection (dpi). Source data are provided as a Source Data file. Each dot indicates each ferret subject. The height of bars indicate mean of viral copy number and error bars indicate their standard deviation.

## Supplementary Fig. 2

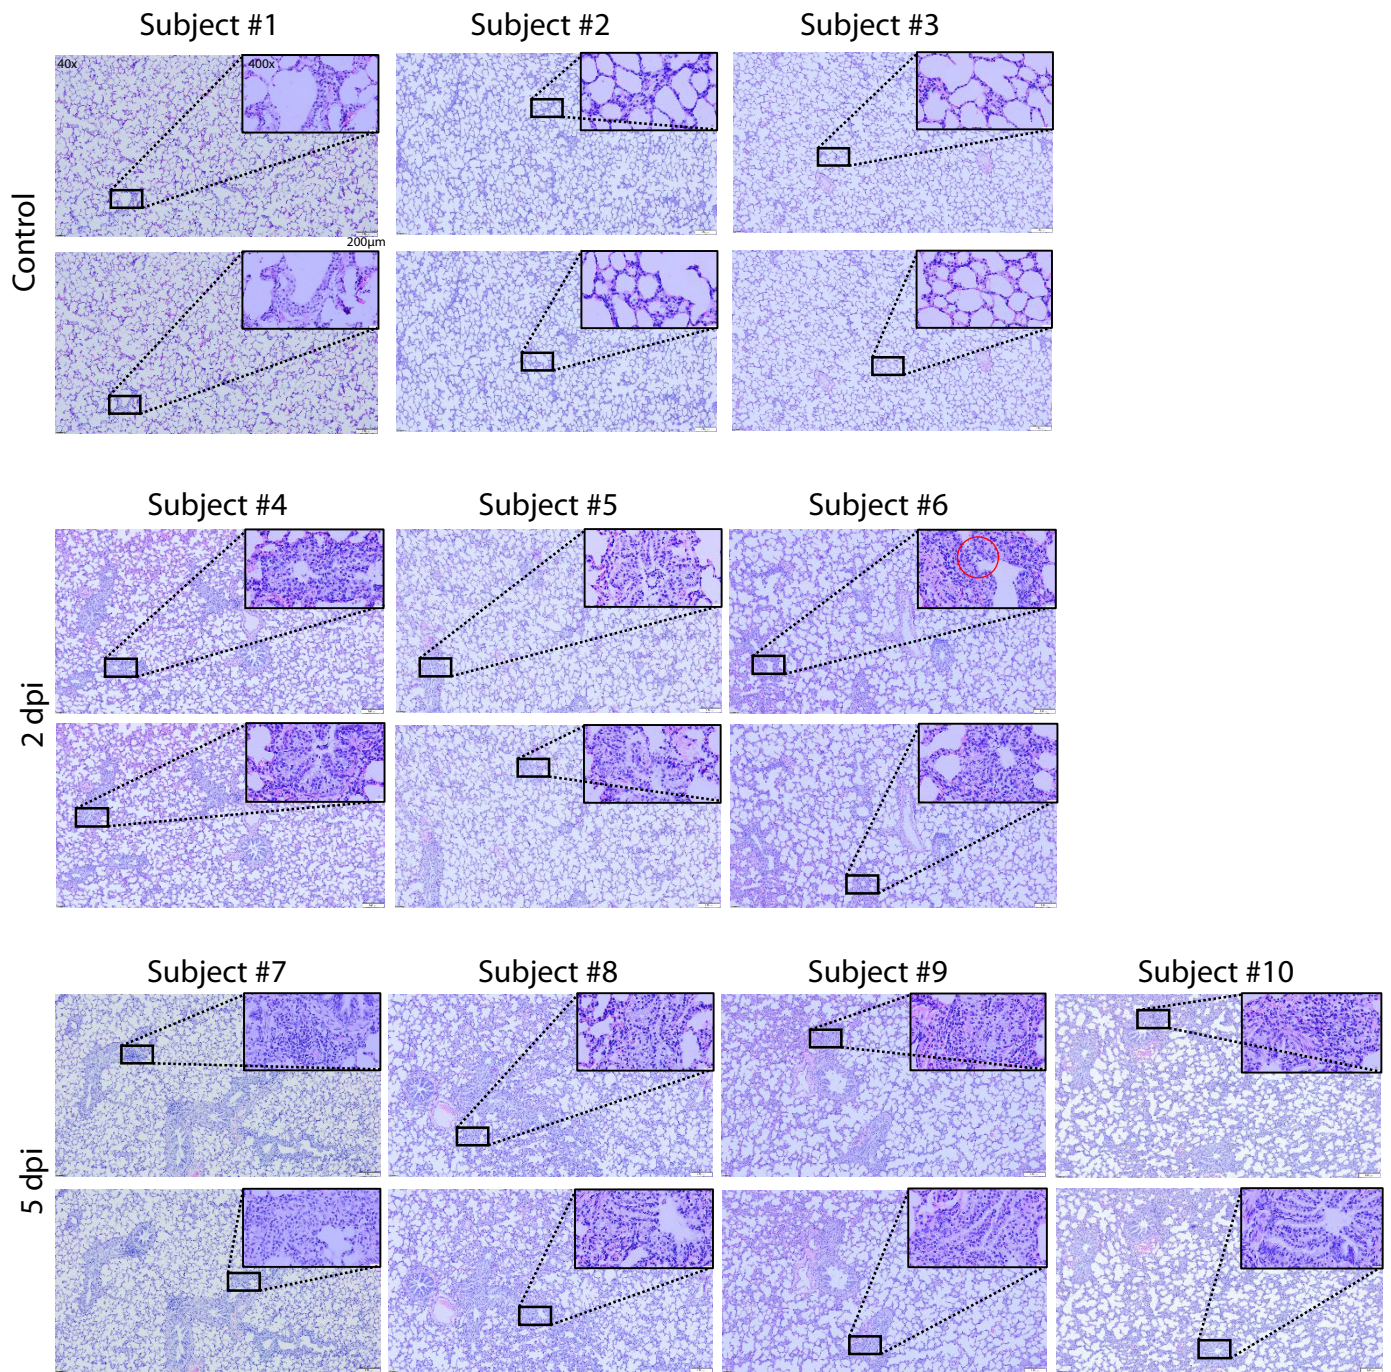

**Supplementary Fig. 2. Histologic features of the lung tissues of ferrets.** Histologic features of the lung tissues of negative control ferrets (n = 3), and SARS-CoV-2-infected ferrets on 2 (n = 3) and 5 days (n = 4) post-infection (dpi). Prominent bronchitis near the bronchial lining is marked by red circle on the image of subject #6. Two 400x magnified images of each histology slide from all 10 ferret subjects were presented. The scale bars indicate 200µm.





## Supplementary Fig. 3 (Cont.)

**Supplementary Fig. 3. Clustering of cells obtained from BAL fluid based on single cell transcriptome**  
**a** UMAP plot colored according to cluster. **b** Proportion of each cell type at 0 days post-infection (dpi) (n = 3), 2 dpi (n = 3), and 5 dpi (n = 4). **c** Dot blots displaying the top 10 enriched genes of each cluster. **d** UMAP plots showing normalized expression of known markers. **e** UMAP plot, with color density reflecting the distribution of cells at 0, 2, and 5 dpi. **f** UMAP plot of virus-read-containing cells (red dots). Source data are provided as a Source Data file.

## Supplementary Fig. 4

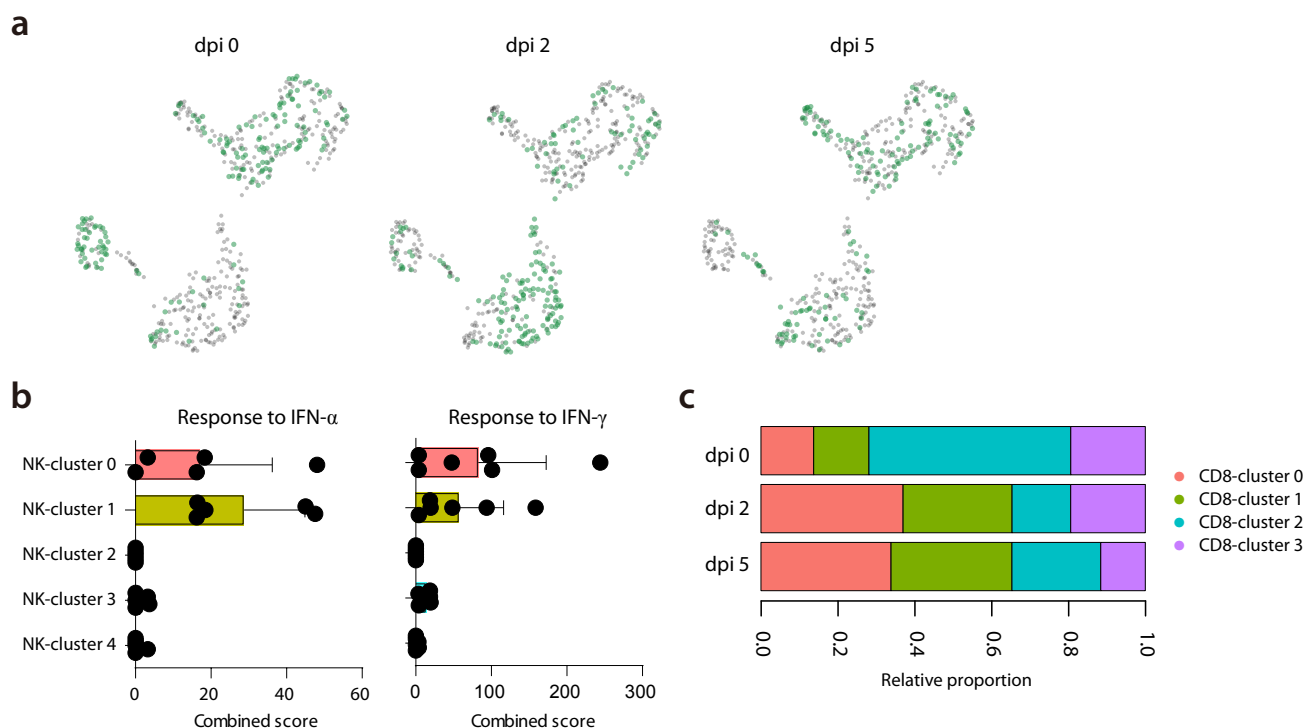

**Supplementary Fig. 4. Sub-clustering of CD8<sup>+</sup> T cells.** **a** UMAP plot, with color density reflecting the distribution of NK cells at 0, 2, and 5 days post-infection (dpi). **b** Bar graphs with mean and standard deviation of ‘combined score’ showing the results of gene set enrichment analysis on five NK cell clusters using two gene sets: “Response to IFN- $\alpha$ ” (left) and “Response to IFN- $\gamma$ ” (right). Gene sets are derived from six cell lines (MCF10A, MDAMB231, BT20, HS578T, MCF7, and SKBR3) provided by Enrichr<sup>27</sup>. **c** Proportion of each cell type in CD8<sup>+</sup> T cell clusters at uninfected control (n = 3), 2 dpi (n = 3), and 5 dpi (n = 4). Source data are provided as a Source Data file.

# Supplementary Fig. 5

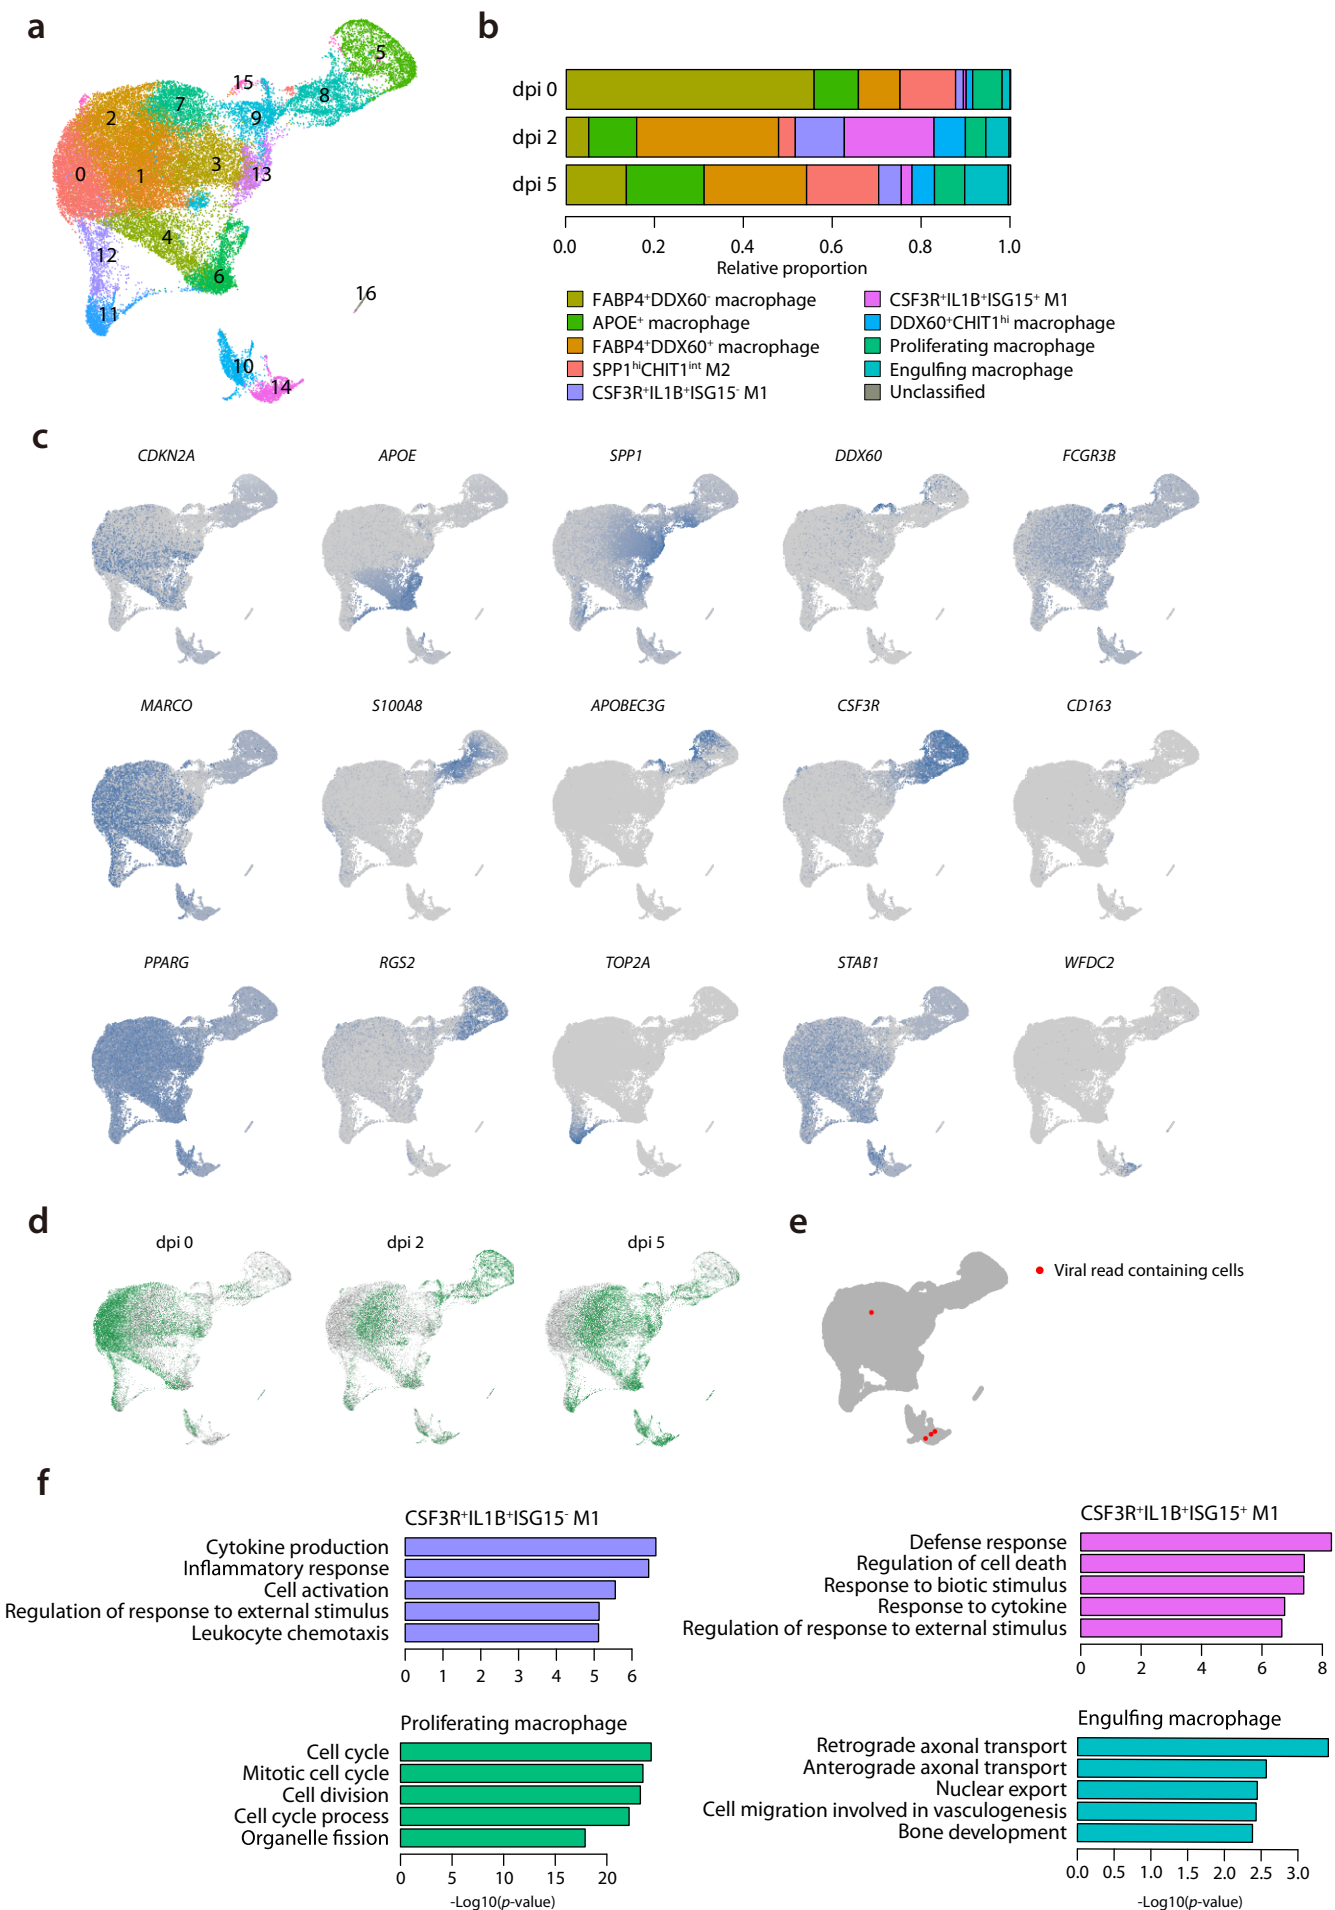

## Supplementary Fig. 5 (Cont.)

**Supplementary Fig. 5. Sub-clustering of macrophages.** **a** UMAP plot of macrophage subpopulations, colored according to clusters. **b** Proportion of each macrophage subpopulation at 0 days post-infection (dpi) (n = 3), 2 dpi (n = 3), and 5 dpi (n = 4). **c** UMAP plots showing normalized expression of known markers of macrophage subpopulations. **d** UMAP plot with color density reflecting distribution of macrophage subpopulations at 0, 2, and 5 dpi. **e** Virus read containing cells (red dot) in UMAP plot of macrophage subpopulations. **f** Bar plots showing  $-\log_{10}(\text{p value})$  in top-five enrichment analysis of representative GO biological pathways among CSF3R<sup>+</sup>IL1B<sup>+</sup>ISG15<sup>-</sup> (weakly activated M1), CSF3R<sup>+</sup>IL1B<sup>+</sup>ISG15<sup>+</sup> (highly activated M1), proliferating macrophages, and engulfing macrophages. The p values are calculated from a theoretical null-distribution with two-sided Wilcoxon signed-rank test. Source data are provided as a Source Data file.



## Supplementary Fig. 6

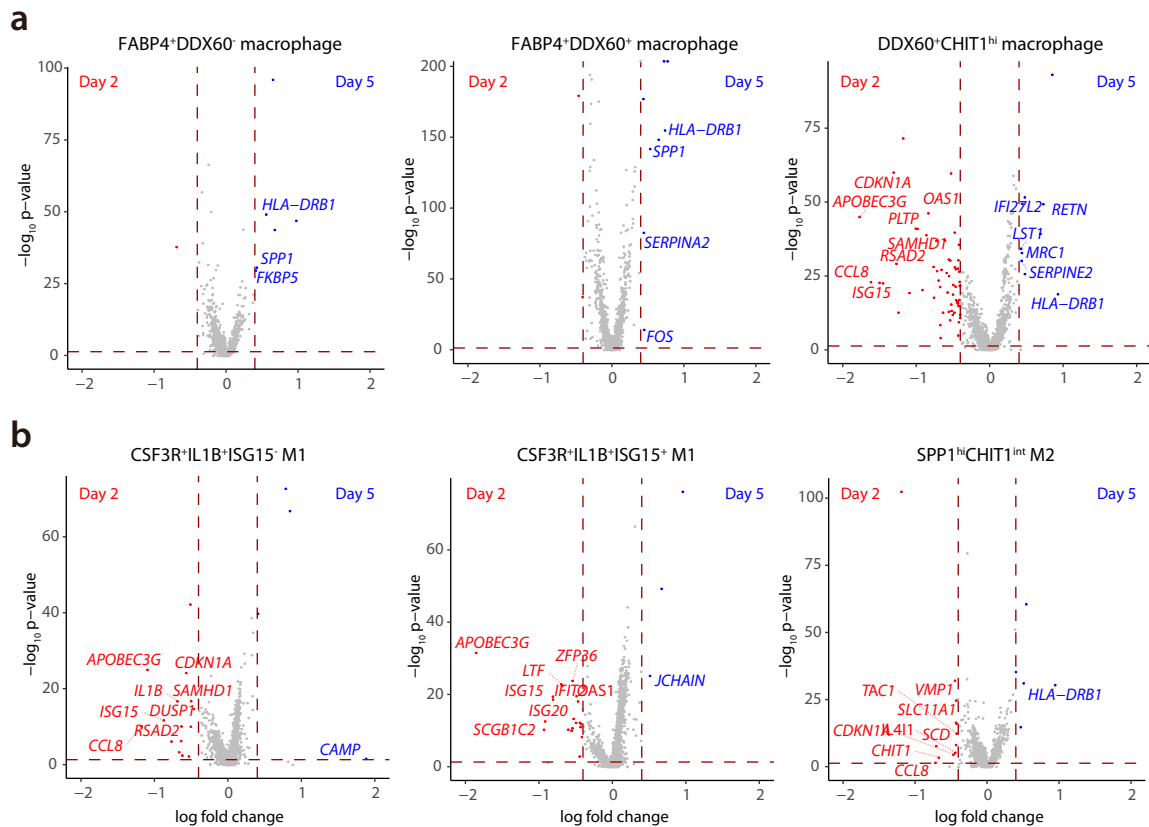

**Supplementary Fig. 6. DEGs of macrophages between 2 dpi and 5 dpi.** **a, b** Volcano plots showing DEGs between 2 days post-infection (dpi) and 5 dpi among FABP4<sup>+</sup>DDX60<sup>-</sup> macrophages (resting tissue macrophages), FABP4<sup>+</sup>DDX60<sup>+</sup> macrophages (activated tissue macrophages), DDX60<sup>+</sup>CHIT1<sup>hi</sup> macrophages (monocyte-derived infiltrating), CSF3R<sup>+</sup>IL1B<sup>+</sup>ISG15<sup>-</sup> (weakly activated M1), CSF3R<sup>+</sup>IL1B<sup>+</sup>ISG15<sup>+</sup> (highly activated M1), and SPP1<sup>hi</sup>CHIT1<sup>int</sup> M2 (potentially profibrogenic). Each dot indicates an individual gene. Red indicates a gene that is a significant DEG at 2 dpi, and blue indicates a gene that is a significant DEG at 5 dpi. In the graphs, vertical dashed lines indicate  $|\text{Log fold change}| < 0.4$ , and horizontal dashed lines indicate  $p < 0.05$ . The p values are calculated with two-sided Wilcoxon signed-rank test.

## Supplementary Fig. 7

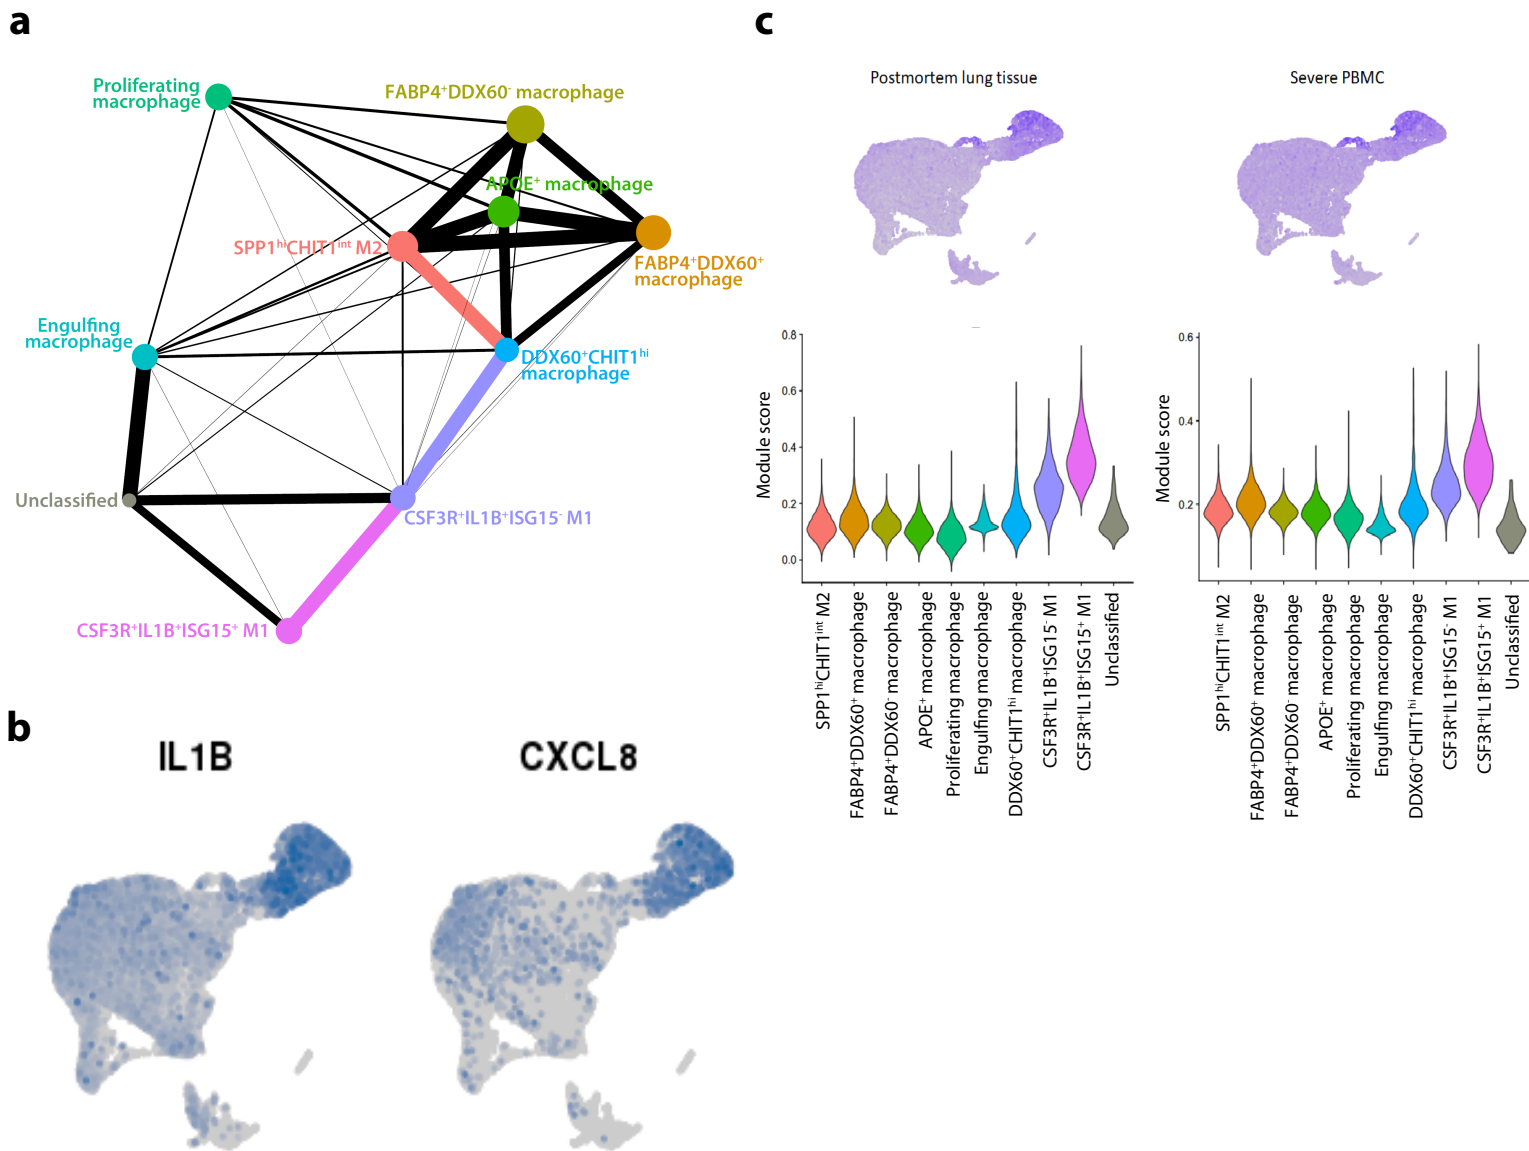

**Supplementary Fig. 7. Gene expression patterns of sub-clusters of macrophages.** **a** Partition-based graph abstraction (PAGA) abstracting trajectory analysis among macrophage subpopulations. **b** UMAP plots showing normalized expressions of IL1B and CXCL8 in the macrophage subpopulations. **c** Gene set enrichment analysis of each macrophage subcluster, using publicly available gene sets. Left: Analysis using differentially expressed genes (DEGs) from transcriptome analysis of post-mortem lung tissue from COVID-19 patients and normal lung tissue (GSE147507). Right: Analysis using DEGs from single-cell transcriptome analysis of peripheral blood mononuclear cells (PBMCs) from patients with severe and mild COVID-19 (GSE149689).

# Supplementary Fig. 8

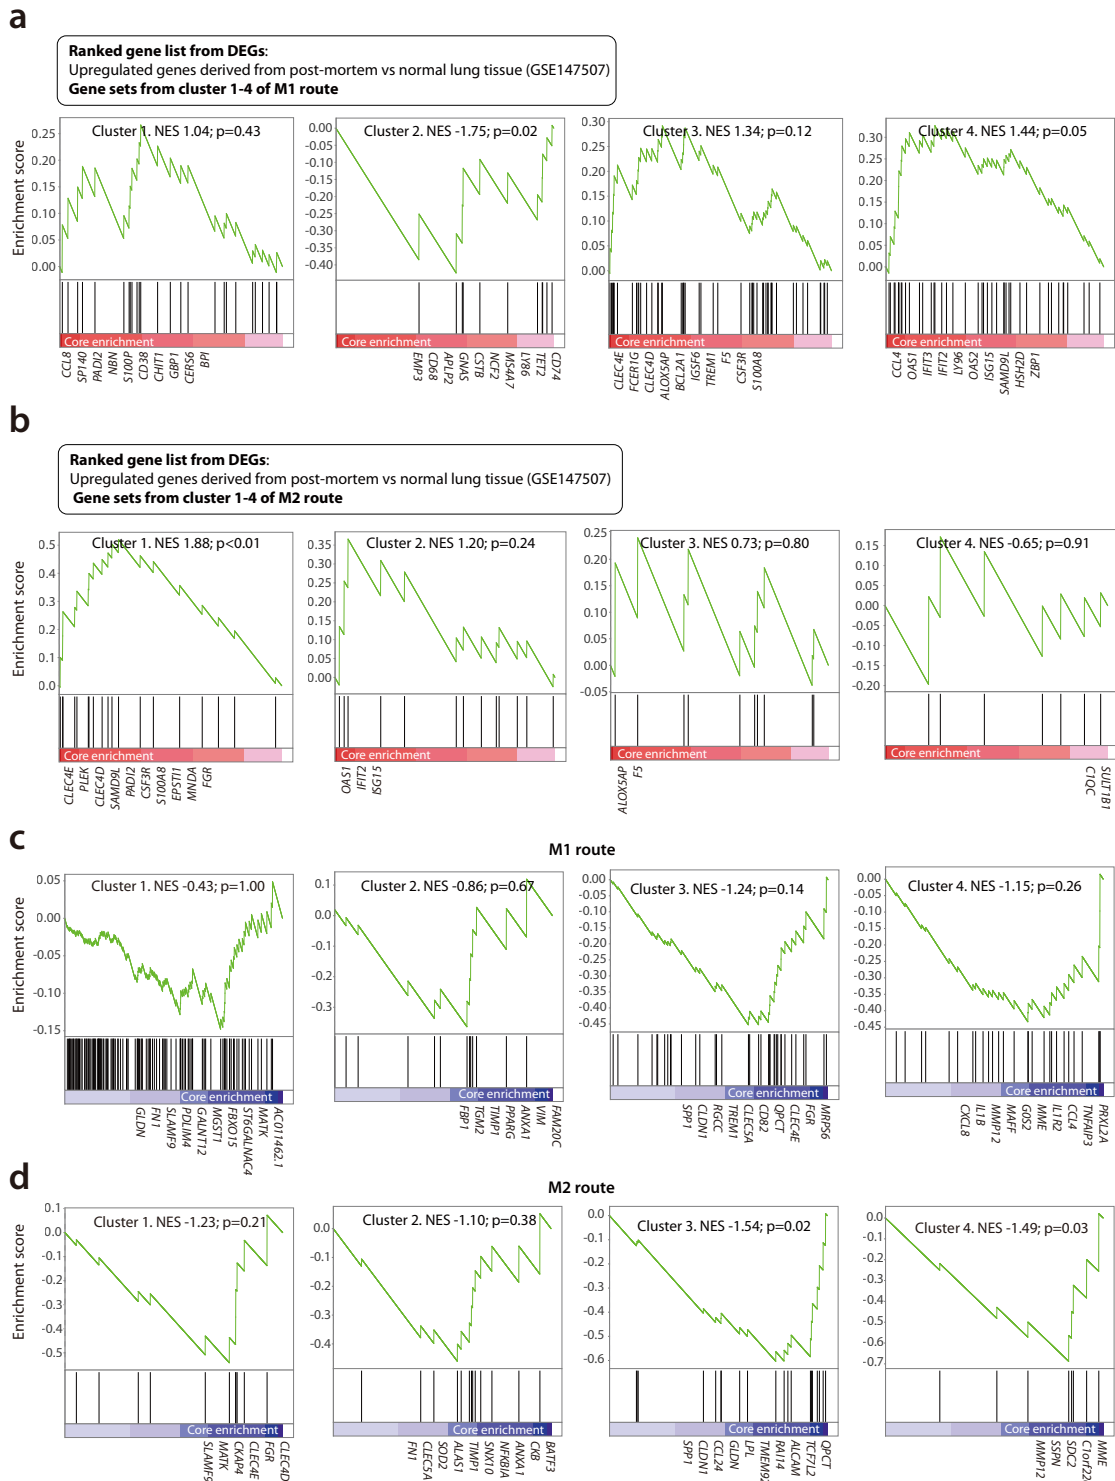

**Supplementary Fig. 8. GSEA using DEGs of cluster 1-4 of the M1 and M2 route. a, b** GSEA of clusters 1–4 of the M1 route a. and M2 route b. using ranked gene list originated from public transcriptome data, including post-mortem lung tissue from a COVID-19 patient (GSE147507). **c, d** GSEA of clusters 1–4 of the M1 route c. and M2 route d. using ranked gene list originated from etanercept-downregulated DEGs derived from in vitro experiment described in Fig. 5c. The name of genes included as core enrichment were listed, NES, normalized enrichment score. The p values of GSEA is the probability under the null -distribution calculated by permutation test.
