# Supplementary material for: Single-cell transcriptome of bronchoalveolar lavage fluid reveals sequential change of macrophages during SARS-CoV-2 infection in ferrets
Source: PubMed Central journal article supplement (PMC8316405; doi:10.1038/s41467-021-24807-0), 2021-07-27
Supplement: 41467_2021_24807_MOESM2_ESM.pdf [file 41467_2021_24807_MOESM2_ESM.pdf]

## **Description of Additional Supplementary Files**

File Name: Supplementary Data 1

Description: List of Marker Genes for Each Cluster of Total BAL Fluid Cells

File Name: Supplementary Data 2

Description: List of Marker Genes for Each Subcluster of NK Cells

File Name: Supplementary Data 3

Description: List of Marker Genes for Each Subcluster of CD8+ 907 T Cells

File Name: Supplementary Data 4

Description: List of Marker Genes for Each Subcluster of Macrophages

File Name: Supplementary Data 5

Description: List of Genes Upregulated in Clusters 1–4 of M1 Route Pseudotime

File Name: Supplementary Data 6

Description: List of Genes Upregulated in Clusters 1–4 of M2 Route Pseudotime

File Name: Supplementary Data 7

Description: List of Genes with Rank, Downregulated by Dexamethasone

File Name: Supplementary Data 8

Description: List of Gene with Rank, Downregulated by Etanercept
